# Supplementary material
Source: Springer Nature journal article supplement (https://www.springermedizin.de/resource/supplementary/12905_2007_116_MOESM1_ESM.pdf/9519112)

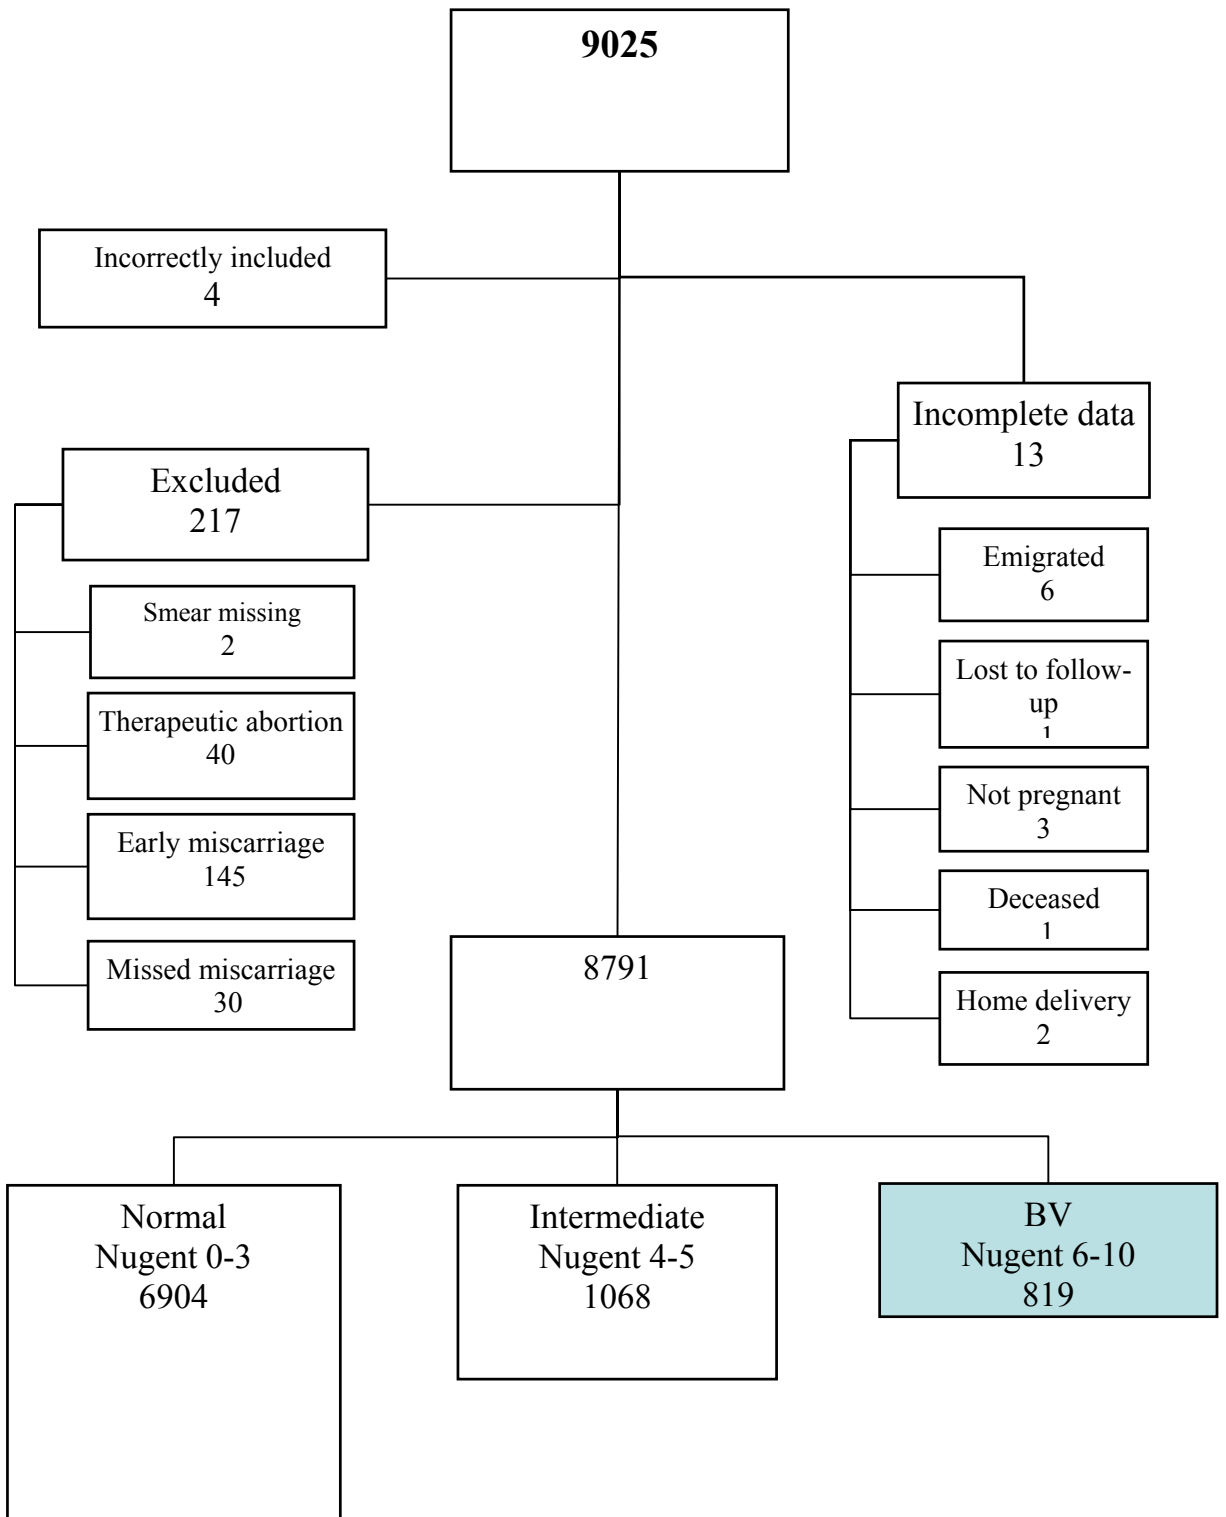

Supplement: MOESM1 [file 9519112]
